# Supplementary material for: Reduced efficacies of diclazuril and toltrazuril against Eimeria ovinoidalis and Eimeria crandallis in two French sheep-meat farms
Source: Research Square preprint supplement (doi:10.21203/rs.3.rs-1350794/v1), 2022-02-15
Supplement: Supplementary file 1 [file 172a5619ebc249bc409f1d40.xlsx]

## Sheet: Dataset 1 Individual OPG
Breed	Rams identification Number	birth date	Group	OPG D0	OPG D8
Berrichon du Cher	097	2020-09-12	Control	19800	10800
Berrichon du Cher	078	2020-09-10	Control	700	3350
Berrichon du Cher	088	2020-09-14	Control	5200	6700
Berrichon du Cher	103	2020-09-15	Control	8700	7050
Berrichon du Cher	028	2020-09-13	Control	4550	1550
Berrichon du Cher	042	2020-09-19	Control	3600	7350
Berrichon du Cher	037	2020-09-18	Control	2300	2450
Berrichon du Cher	079	2020-09-10	Control	500	10400
Berrichon du Cher	092	2020-09-15	Control	1400	6300
Berrichon du Cher	007	2020-09-11	Control	850	3300
Berrichon du Cher	077	2020-09-10	Control	2100	1000
Berrichon du Cher	038	2020-09-18	Toltrazuril	15800	1350
Berrichon du Cher	089	2020-09-15	Toltrazuril	9800	50
Berrichon du Cher	098	2020-09-12	Toltrazuril	2600	0
Berrichon du Cher	013	2020-09-11	Toltrazuril	3800	0
Berrichon du Cher	082	2020-09-13	Toltrazuril	3300	150
Berrichon du Cher	099	2020-09-14	Toltrazuril	3100	100
Berrichon du Cher	022	2020-09-13	Toltrazuril	10850	150
Berrichon du Cher	060	2020-09-18	Toltrazuril	6200	150
Berrichon du Cher	018	2020-09-13	Toltrazuril	7100	0
Berrichon du Cher	041	2020-09-19	Toltrazuril	3050	50
Berrichon du Cher	004	2020-09-10	Toltrazuril	3200	0
Berrichon du Cher	058	2020-09-18	Toltrazuril	13750	100
Berrichon du Cher	005		Toltrazuril	12750	50
Berrichon du Cher	084	2020-09-13	Toltrazuril	8800	350
Berrichon du Cher	025	2020-09-13	Diclazuril	2500	200
Berrichon du Cher	044	2020-09-21	Diclazuril	21800	0
Berrichon du Cher	055	2020-09-17	Diclazuril	8800	400
Berrichon du Cher	027	2020-09-13	Diclazuril	5450	450
Berrichon du Cher	033	2020-09-16	Diclazuril	3600	1250
Berrichon du Cher	074	2020-09-26	Diclazuril	10650	1050
Berrichon du Cher	023	2020-09-13	Diclazuril	4000	250
Berrichon du Cher	050	2020-09-20	Diclazuril	13000	250
Berrichon du Cher	017	2020-09-21	Diclazuril	2300	0
Berrichon du Cher	036	2020-09-18	Diclazuril	2950	2000
Berrichon du Cher	047	2020-09-30	Diclazuril	5500	1250
Berrichon du Cher	049	2020-09-16	Diclazuril	6200	400
Berrichon du Cher	100	2020-09-14	Diclazuril	17400	200
Berrichon du Cher	102		Diclazuril	1050	250
Rouge de l'Ouest	105	2021-02-02	Control	27200	8350
Rouge de l'Ouest	110	2021-02-17	Control	50500	9150
Rouge de l'Ouest	114	2021-02-15	Control	3100	120600
Rouge de l'Ouest	115	2021-02-16	Control	58800	600
Rouge de l'Ouest	119	2021-02-26	Control	57800	115200
Rouge de l'Ouest	120	2021-02-12	Control	6600	3000
Rouge de l'Ouest	126	2021-02-03	Control	12800	8050
Rouge de l'Ouest	127	2021-02-05	Control	3600	100800
Rouge de l'Ouest	129	2021-02-08	Control	1250	9750
Rouge de l'Ouest	134	2021-02-25	Control	2550	4800
Rouge de l'Ouest	136	2021-02-11	Control	4850	13100
Rouge de l'Ouest	140	2021-02-14	Control	1350	1500
Rouge de l'Ouest	141	2021-02-20	Control	4050	4050
Rouge de l'Ouest	143	2021-02-11	Control	7850	1750
Rouge de l'Ouest	148	2021-02-16	Control	1250	1000
Rouge de l'Ouest	151	2021-02-05	Control	13650	5550
Rouge de l'Ouest	103	2021-02-01	Toltrazuril	41050	50
Rouge de l'Ouest	107	2021-02-04	Toltrazuril	5500	850
Rouge de l'Ouest	108	2021-02-12	Toltrazuril	8100	100
Rouge de l'Ouest	109	2021-02-14	Toltrazuril	15400	50
Rouge de l'Ouest	111	2021-02-22	Toltrazuril	4850	50
Rouge de l'Ouest	116	2021-02-16	Toltrazuril	5700	0
Rouge de l'Ouest	123	2021-02-15	Toltrazuril	21900	50
Rouge de l'Ouest	130	2021-02-08	Toltrazuril	1450	0
Rouge de l'Ouest	132	2021-02-17	Toltrazuril	20600	0
Rouge de l'Ouest	135	2021-02-28	Toltrazuril	58000	0
Rouge de l'Ouest	139	2021-02-14	Toltrazuril	18150	100
Rouge de l'Ouest	142	2021-02-12	Toltrazuril	8200	200
Rouge de l'Ouest	145	2021-02-15	Toltrazuril	7350	3550
Rouge de l'Ouest	146	2021-02-15	Toltrazuril	15150	100
Rouge de l'Ouest	154	2021-02-15	Toltrazuril	21350	50
Rouge de l'Ouest	104	2021-02-02	Diclazuril	15450	5650
Rouge de l'Ouest	106	2021-02-03	Diclazuril	1500	0
Rouge de l'Ouest	112	2021-02-24	Diclazuril	9950	350
Rouge de l'Ouest	118	2021-02-23	Diclazuril	30250	3000
Rouge de l'Ouest	122	2021-02-12	Diclazuril	6400	450
Rouge de l'Ouest	124	2021-02-15	Diclazuril	60100	1650
Rouge de l'Ouest	125	2021-02-03	Diclazuril	2400	50
Rouge de l'Ouest	133	2021-02-17	Diclazuril	10550	200
Rouge de l'Ouest	138	2021-02-14	Diclazuril	12400	100
Rouge de l'Ouest	144	2021-02-14	Diclazuril	8700	200
Rouge de l'Ouest	147	2021-02-15	Diclazuril	36000	1450
Rouge de l'Ouest	150	2021-02-05	Diclazuril	4950	250
Rouge de l'Ouest	152	2021-02-09	Diclazuril	3350	0
Rouge de l'Ouest	153	2021-02-08	Diclazuril	8250	150

## Sheet: Dataset 2 Eimeria spp
Breed	Group	Date		Eimeria parva/ Eimeria pallida	Eimeria ovinoidalis/ Eimeria marsica	Eimeria crandallis/ Eimeria weybridgensis	Eimeria faurei	Eimeria granulosa/ Eimeria bakuensis	Eimeria ahsata	Eimeria intricata	Total
Berrichon du Cher	Control	D0	Oocyst identified	5	10	5	2	21	18	0	61
Berrichon du Cher			Proportion (%)	8.19672	16.3934	8.19672	3.27869	34.4262	29.5082	0	100
Berrichon du Cher			Total Oocyst (OPG)	370.328	740.656	370.328	148.131	1555.38	1333.18	0	4518
Berrichon du Cher		D8	Oocyst identified	7	28	12	10	16	0	1	74
Berrichon du Cher			Proportion (%)	9.45946	37.8378	16.2162	13.5135	21.6216	0	1.35135	100
Berrichon du Cher			Total Oocyst (OPG)	518.095	2072.38	888.162	740.135	1184.22	0	74.0135	5477
Berrichon du Cher	Toltrazuril	D0	Oocyst identified	15	25	20	2	23	27	3	115
Berrichon du Cher			Proportion (%)	13	21.7	17.4	1.7	20	23.5	2.6	100
Berrichon du Cher			Total Oocyst (OPG)	966.68	1613.61	1293.86	126.412	1487.2	1747.46	193.336	7436
Berrichon du Cher		D8	Oocyst identified	5	6	20	3	7	0	0	41
Berrichon du Cher			Proportion (%)	12.2	14.6	48.8	7.3	17.1	0	0	100
Berrichon du Cher			Total Oocyst (OPG)	21.838	26.134	87.352	13.067	30.609	0	0	179
Berrichon du Cher	Diclazuril	D0	Oocyst identified	11	31	6	0	9	6	0	63
Berrichon du Cher			Proportion (%)	17.4	49.2	9.5	0	14.28	9.5	0	100
Berrichon du Cher			Total Oocyst (OPG)	1307.44	3696.89	713.83	0	1073	713.83	0	7514
Berrichon du Cher		D8	Oocyst identified	2	14	9	0	4	0	0	29
Berrichon du Cher			Proportion (%)	6.9	48.27	31	0	13.8	0	0	100
Berrichon du Cher			Total Oocyst (OPG)	39.192	274.174	176.08	0	78.384	0	0	568
Rouge de l'Ouest	Control	D0	Oocyst identified	5	33	10	0	21	30	1	100
Rouge de l'Ouest			Proportion (%)	5	33	10	0	21	30	1	100
Rouge de l'Ouest			Total Oocyst (OPG)	803.75	5304.75	1607.5	0	3375.75	4822.5	160.75	16075
Rouge de l'Ouest		D8	Oocyst identified	14	25	7	5	17	31	1	100
Rouge de l'Ouest			Proportion (%)	14	25	7	5	17	31	1	100
Rouge de l'Ouest			Total Oocyst (OPG)	3563.42	6363.25	1781.71	1272.65	4327.01	7890.43	254.53	25453
Rouge de l'Ouest	Toltrazuril	D0	Oocyst identified	11	30	10	7	31	10	1	100
Rouge de l'Ouest			Proportion (%)	11	30	10	7	31	10	1	100
Rouge de l'Ouest			Total Oocyst (OPG)	1853.5	5055	1685	1179.5	5223.5	1685	168.5	16850
Rouge de l'Ouest		D8	Oocyst identified	8	9	1	0	0	0	0	18
Rouge de l'Ouest			Proportion (%)	44.5	50	5.5	0	0	0	0	100
Rouge de l'Ouest			Total Oocyst (OPG)	152.769	171.65	18.8815	0	0	0	0	343.3
Rouge de l'Ouest	Diclazuril	D0	Oocyst identified	7	38	9	2	32	12	0	100
Rouge de l'Ouest			Proportion (%)	7	38	9	2	32	12	0	100
Rouge de l'Ouest			Total Oocyst (OPG)	1051.26	5706.84	1351.62	300.36	4805.76	1802.16	0	15018
Rouge de l'Ouest		D8	Oocyst identified	11	38	22	0	8	0	0	79
Rouge de l'Ouest			Proportion (%)	13.9	48.1	27.9	0	10.1	0	0	100
Rouge de l'Ouest			Total Oocyst (OPG)	133.996	463.684	268.956	0	97.364	0	0	964
